# Supplementary material
Source: publisher site journal article supplement (https://www.dovepress.com/article/supplementary_file/537676/537676%20Revised%20appendix.docx)
Supplement: Supplementary file 1 [file 537676%20Revised%20appendix.docx]

**Supplementary Material**

| **eMethods** |  |
| --- | --- |
| Exclusion criteria | P3 |
|  |  |
| **eTables** |  |
| **eTable 1.** Anatomical Therapeutic Chemical (ATC) classification system codes used to identify use of LAMA/LABA/ICS FDC or LABA/ICS FDC reimbursed in Taiwan between 2019-2022 | P4 |
|  |  |
| **eTable 2.** International Classification of Diseases, 10th Revision, Clinical Modification (ICD-10-CM) diagnosis codes used to identify cardiovascular outcomes | P5 |
|  |  |
| **eTable 3.** International Classification of Diseases, 10th Revision, Clinical Modification (ICD-10-CM) diagnosis or procedure codes or Taiwan health insurance service claims codesused to identify comorbidities at baseline | P6 |
|  |  |
| **eTable 4.** Anatomical Therapeutic Chemical (ATC) classification system codes used to identify concurrent medication use at baseline | P9 |
|  |  |
| **eTable 5.** International Classification of Diseases, 10th Revision, Clinical Modification (ICD-10-CM) diagnosis or procedure codes or Taiwan health insurance service claims codesused to measure healthcare services at baseline | P11 |
|  |  |
| **eTable 6.** Distribution of LAMA/LABA/ICS FDC initiators and LABA/ICS FDC users by cohort entry year | P13 |
|  |  |
| **eTable 7.** Baseline patient characteristics by study treatment | P14 |
|  |  |
| **eTable 8.** Composite cardiovascular events and HR comparing LAMA/LABA/ICS FDC to LABA/ICS FDC by underlying disease, baseline characteristics, and prior maintenance medication use | P19 |
|  |  |
| **eTable 9.** Composite cardiovascular events and HR comparing LAMA/LABA/ICS FDC to LABA/ICS FDC by individual study treatment | P21 |
|  |  |
| **eTable 10.** Composite cardiovascular events and HR comparing LAMA/LABA/ICS FDC to LABA/ICS FDC by treatment duration of LAMA/LABA/ICS FDC | P22 |
|  |  |
| **eTable 11.** Composite cardiovascular events and HR comparing LAMA/LABA/ICS FDC to LABA/ICS FDC in different sensitivity analyses | P23 |
|  |  |
| **eTable 12.** Follow-up, incidence rate, and HR of composite cardiovascular events comparing LAMA/LABA/ICS FDC to LABA/ICS FDC based on an intention-to-treat approach | P24 |
|  |  |
| **eTable 13.** Number (%) of patients with corresponding baseline clinical measurements | P25 |
|  |  |
| **eTable 14.** Baseline clinical measurements after imputation | P26 |
|  |  |
| **eTable 15**. Comparison between IMPACT, ETHOS, TRILOGY trials and the present study | P28 |
|  |  |
| **eFigures** |  |
| **eFigure 1.** Visualization of the research framework | P30 |
|  |  |
| **eFigure 2.** Flow chart of cohort identification | P31 |
|  |  |
| **eFigure 3.** PSplots for LAMA/LABA/ICS FDC and LABA/ICS FDC. (a) Before PS matching (c-statistics=0.902). (b) After 1:10 variable-ratio PS matching | P32 |
|  |  |
| **eFigure 4.** Cumulative incidence plots of composite cardiovascular events for LAMA/LABA/ICS FDC and LABA/ICS FDC. (a) Before PS matching. (b) After 1:10 variable-ratio PS matching | P34 |
|  |  |
| **eReferences** | P36 |

**eMethods**

**Exclusion criteria**

This cohort study conducted in the Taiwan NHIRD recruited patients with COPD who received LAMA/LABA/ICS FDC or LABA/ICS FDC between 2019/1/1 and 2022/12/31. The date of the earliest dispensing of a LAMA/LABA/ICS FDC or LABA/ICS FDC following a COPD diagnosis was defined as the cohort entry date.

Detailed exclusion criteria included

- Patients aged <40 years or >100 years at COPD diagnosis and those with ambiguous or missing age or sex information
- Patients who had no interactions with the healthcare system, defined as without any outpatient, emergency department, or inpatient visits within 365 days before cohort entry
- Patients who received LAMA/LABA/ICS FDC within 365 days before cohort entry
- Patients who simultaneously received LAMA/LABA/ICS FDC and LABA/ICS FDC, who received LAMA containing regimens (for LABA/ICS FDC users), or who received more than one LAMA/LABA/ICS FDC or more than one LABA/ICS FDC at cohort entry.
- Patients with an asthma diagnosis within 365 days before or at cohort entry
- A very small proportion of patients who had death records before or at cohort entry
- A very small proportion of patients whose cohort entry date was 2022/12/31

**eTable 1.** Anatomical Therapeutic Chemical (ATC) classification system codesa,b used to identify use of LAMA/LABA/ICS FDC or LABA/ICS FDC reimbursed in Taiwan between 2019-2022

| Study treatments (brand name) | Abbreviation | ATC codes | Device | Reimbursement date | Reimbursement price (NTD) |
| --- | --- | --- | --- | --- | --- |
| LAMA/LABA/ICS FDC | | | | | |
| Umeclidinium/Vilanterol/Fluticasone (TrelegyEllipta ®) | UME/VIL/FLU | R03AL08 | DPI | 2019/07/01 | 1,603-1,770 |
| Glycopyrronium/Formoterol/Beclomethasone  Trimbow® | GLY/FOR/BEC | R03AL09 | MDI | 2020/03/01 | 1,527-1,770 |
| LABA/ICS FDC | | | | | |
| Salmeterol/Fluticasone (Seretide®, Airflusal®, Seroflo®) | SAL/FLU | R03AK06 | DPI, MDI | 2002/03/01 | 598-1,983 |
| Formoterol/Budesonide (Symbicort®) | FOR/BUD | R03AK07 | DPI, MDI | 2002/04/01 | 858-1,501 |
| Formoterol/Beclomethasone (Foster®) | FOR/BEC | R03AK08 | DPI, MDI | 2010/12/01 | 646-992 |
| Vilanterol/Fluticasone (Relvar®) | VIL/FLU | R03AK10 | DPI | 2015/05/01 | 800-1,293 |
| Formoterol/Fluticasone (Flutiform®) | FOR/FLU | R03AK11 | MDI | 2015/06/01 | 598-1,190 |

DPI, dry powder inhaler; FDC, fixed-dose combination; ICS, Inhaled corticosteroids; LABA, long-acting β2 agonists; LAMA, long-acting muscarinic antagonists; MDI, metered dose inhaler; NTD, New Taiwan dollar.

aBased on outpatient pharmacy dispensing claims.

b<https://info.nhi.gov.tw/INAE3000/INAE3000S01> Accessed on January 10, 2025.

**eTable 2.** International Classification of Diseases, 10th Revision, Clinical Modification (ICD-10-CM) diagnosis codesa used to identify cardiovascular outcomes

| Outcomes | ICD-10-CM diagnosis codes | PPVs[Ref] |
| --- | --- | --- |
| Acute myocardial infarction | I21 | 100%[1] |
| Unstable angina | I20.0 | 88.9%[2] |
| Ischemic stroke | I63 | 99.8%[3] |
| Congestive heart failure | I50 | 95.9%[4] |
| Cardiac dysrhythmia | I46.9, I47.2, I49.0, R99 | 79.7%b[5,6] |

PPVs, positive predicted values.

aBased on the primary diagnosis position in the inpatient claims.

bThe PPV was based on ICD-9-CM diagnosis codes of 427.1, 427.4, 427.41, 427.42, 427.5, 798, 798.1, and 798.2; mapping to ICD-10-CM codes was performed after clinical opinions.

**eTable 3.** International Classification of Diseases, 10th Revision, Clinical Modification (ICD-10-CM) diagnosis or procedure codesa or Taiwan health insurance service claims codesa,b used to identify comorbidities at baseline

| Comorbidities | ICD-10-CM diagnosis or procedure codes or Taiwan health insurance services claims codes |
| --- | --- |
| Hypertension | ICD-10-CM diagnosis codes: I10-I15, N26.2 |
| Ischemic heart disease or angina | ICD-10-CM diagnosis codes: I20, I24, I25 |
| Myocardial infarction | ICD-10-CM diagnosis codes: I21, I22, I25.2 |
| Coronary revascularization | Coronary artery bypass grafting  ICD-10-CM procedure codes: 0210093, 02100A3, 20100J3, 02100K3, 02100Z3, 0210493, 02104A3, 02104J3, 02104K3, 02104Z3, 021009W, 02100AW, 02100JW, 02100KW, 021049W, 02104AW, 02104JW, 02104KW, 021109W, 02110AW, 02110JW, 02110KW, 021149W, 02114AW, 02114JW, 02114KW, 021209W, 02120AW, 02120JW, 02120KW, 021249W, 02124AW, 02124JW, 02124KW, 021309W, 02130AW, 02130JW, 02130KW, 021349W, 02134AW, 02134JW, 02134KW, 0210098, 0210099, 021009C, 02100A8, 02100A9, 02100AC, 02100J8, 02100J9, 02100JC, 02100K8, 02100K9, 02100KC, 02100Z8, 02100Z9, 02100ZC, 0210498, 0210499, 021049C, 02104A8, 02104A9, 02104AC, 02104J8, 02104J9, 02104JC, 02104K8, 02104K9, 02104KC, 02104Z8, 02104Z9, 02104ZC, 0211098, 0211099, 021109C, 02110A8, 02110A9, 02110AC, 02110J8, 02110J9, 02110JC, 02110J8, 02110K9, 02110KC, 02110Z8, 02110Z9, 02110ZC, 0211498, 0211499, 021149C, 02114A8, 02114A9, 02114AC, 02114J8, 02114J9, 02114JC, 02114K8, 02114K9, 02114KC, 02114Z8, 02114Z9, 02114ZC, 0212098, 0212099, 021209C, 02120A8, 02120A9, 02120AC, 02120J8, 02120J9, 02120JC, 02120K8, 02120K9, 02120KC, 02120Z8, 02120Z9, 02120ZC, 0212498, 0212499, 021249C, 02124A8, 02124A9, 02124AC, 02124J8, 02124J9, 02124JC, 02124K8, 02124K9, 02124KC, 02124Z8, 02124Z9, 02124ZC, 0213098, 0213099, 021309C, 02130A8, 02130A9, 02130AC, 02130J8, 02130J9, 02130JC, 02130K8, 02130K9, 02130KC, 02130Z8, 02130Z9, 02130ZC, 0213498, 0213499, 021349C, 02134A8, 02134A9, 02134AC, 02134J8, 20134J9, 02134JC, 02134K8, 02134K9, 02134KC, 02134Z8, 02134Z9, 02134ZC, 021009F, 02100AF, 02100JF, 02100KF, 021100ZF, 021049F, 02104AF, 02104JF, 02104KF, 02104ZF, 021109F, 02110AF, 02110JAF, 02110KF, 02110ZF, 021149F, 02114AF, 02114JF, 02114KF, 02114ZF, 021209F, 02120AF, 02120JF, 02120KF, 02120ZF, 021249F, 02124AF, 02124JF, 02124KF, 02124ZF, 021309F, 02130AF, 02130JF, 02130KF, 02130ZF, 021349F, 02134AF, 02134JF, 02134KF, 02134ZF, 0211093, 02110A3, 02110J3, 02110K3, 02110Z3, 0211493, 02114A3, 02114J3, 02114K3, 02114Z3, 0212093, 02120A3, 02120J3, 02120K3, 02120Z3, 0212493, 02124A3, 02124J3, 02124K3, 02124Z3, 0213093, 02130A3, 02130J3, 02130K3, 02130Z3, 0213493, 02134A3, 02134J3, 02134K3, 02134Z3, 021K0Z8, 021K0Z9, 021K0ZC, 021K0ZF, 021K0ZW, 021K4Z8, 021K4Z9, 021K4ZC, 021K4ZF, 021K4ZW, 021L09P, 021L09Q, 021L09R, 021L0AP, 021L0AQ, 021L0AR, 021L0JP, 021L0JQ, 021L0JR, 021L0KP, 021L0KQ, 021L0KR, 021L0Z8, 021L0Z9, 021L0ZC, 021L0ZF, 021L0ZP, 021L0ZQ, 021L0ZR, 021L49P, 021L49Q, 021L49R, 021L4AP, 021L4AQ, 021L4AR, 021L4JP, 021L4JQ, 021L4JR, 021L4KP, 021L4KQ, 021L4KR, 021L4Z8, 021L4Z9, 021L4ZC, 021L4ZF, 021L4ZP, 021L4ZQ, 021L4ZR  Taiwan health insurance service claims codes: 68023A, 68023B, 68024A,68024B, 68025A, 68025B, 68053B, 68054B, 68055B, 83064A1, 97901K, 97902A, 97903B, 97906K, 97907A, 97908B, 97911K, 97912A, 97913B, 97916K, 97917A, 97918B, N26002, N26003  Percutaneous transluminal coronary angioplasty  ICD-10-CM procedure codes: 02703ZZ, 02704ZZ, 3E07317, 02713ZZ, 02714ZZ, 02723ZZ, 02724ZZ, 02733ZZ, 02734ZZ, 02C03ZZ, 02C04ZZ, 02C13ZZ, 02C14ZZ, 02C23ZZ, 02C24ZZ, 02C33ZZ, 02C34ZZ  Taiwan health insurance service claims codes: 33076A, 33076B, 33077A, 33077B, 33078A, 33078B, 97511K, 97512A, 97513B, 97516K, 97517A, 97518B, 97521K, 97522A, 97523B |
| Cardiac dysrhythmia | ICD-10-CM diagnosis codes: I46-I49, R00.1 |
| Congestive heart failure | ICD-10-CM diagnosis codes: I50, I09.81, I11.0, I13.0, I13.2 |
| Cerebrovascular disease | ICD-10-CM diagnosis codes: I60-I63, I65-I69, G45, G46 |
| Ischemic stroke | ICD-10-CM diagnosis codes: I63, I65, I66 |
| Hemorrhagic stroke | ICD-10-CM diagnosis codes: I60-I62 |
| Peripheral vascular disease | ICD-10-CM diagnosis codes: I70.2, I70.92, I79.8, I73.9 |
| Diabetes mellitus | ICD-10-CM diagnosis codes: E08-E11, E13 |
| Hyperlipidemia | ICD-10-CM diagnosis codes: E71.30, E75.21, E75.22, E75.24, E75.3, E75.5, E75.6, E77, E78.0-E78.6, E78.70, E78.79, E78.8, E78.9, E88.1, E88.2, E88.9 |
| Thyroid disease | ICD-10-CM diagnosis codes: E01-E03, E05, E06, E89.0 |
| Pneumonia | ICD-10-CM diagnosis codes: J12-J17, J18.0-J18.2, A481, A37.91, A22.1, B25.0, B44.0 |
| Influenza | ICD-10-CM diagnosis codes: J09-J11 |
| Acute bronchitis | ICD-10-CM diagnosis codes: J18.9, J20.8, J20.9, J21 |
| COVID-19 | ICD-10-CM diagnosis codes: U07.1, J12.82, Z86.16  Taiwan health insurance service claims codes: XCOVID0001, XCOVID0002, XCOVID0003, E5012C |
| Post COVID condition | ICD-10-CM diagnosis codes: U09.9 |
| Chronic liver disease | ICD-10-CM diagnosis codes: B16, B17, B18.0-B18.2, B19.1, B19.2, Z22.51, Z22.52, K70, K73, K74.0, K74.3-K74.6, K75.4, K75.81 |
| Gastritis or peptic ulcer disease | ICD-10-CM diagnosis codes: K25-K29, K31.82, K52.81, K92.0-K92.2 |
| Chronic kidney disease | ICD-10-CM diagnosis codes: I12.0, I13.11, I13.2, N18, Z99.2, Z49.31, Z49.32 |
| Rheumatoid arthritis or osteoarthritis | ICD-10-CM diagnosis codes: M05-M08, M12.0, M15-M19, M32, M33, M34.0, M34.1, M34.9, M35.0, M35.8, M35.9, M45, M46.0, M46.1, M46.8, M46.9, M49 |
| Osteoporosis | ICD-10-CM diagnosis codes: M81 |
| Gout | ICD-10-CM diagnosis codes: M10, M1A.0, M1A.2-M1A.9, N20.0 |
| Any cancer other than lung cancer | ICD-10-CM diagnosis codes: C00-C26, C30-C32, C37-C41, C43-C58, C60-C86, C88, C90-C96, C4A, C7A, C7B, D03, D45, Z51.12 |
| Lung cancer | ICD-10-CM diagnosis codes: C33, C34 |
| Dementia | ICD-10-CM diagnosis codes: F01, F02, F03.90, F05, F10.27, G30, G31.01, G31.09, G31.1, G31.83 |
| Seizure | ICD-10-CM diagnosis codes: G40, R56 |
| Depressive disorder | ICD-10-CM diagnosis codes: F32, F33, F34.1, F43.21, F43.23, F06.3, F39 |
| Anxiety disorder | ICD-10-CM diagnosis codes: F40-F42, F44, F45.0-F45.2, F45.8, F45.9, F48.1, F48.8, F48.9, F68.11, F68.8, F99, R45.2, R45.5, R45.6 |
| Psychotic disorder | ICD-10-CM diagnosis codes: F20, F22, F23, F24, F25, F28, F29, F32.3, F33.3, F44.89, F84.0, F84.3, F84.5, F84.8, F84.9, R44.0, R44.2, R44.3 |
| Bipolar disorder | ICD-10-CM diagnosis codes: F30, F31, F32.8, F33.8, F34.8, F34.9, F39 |

COVID, coronavirus disease.

aBased on any diagnosis or procedure positions or health insurance services records in the claims of outpatient visits, emergency department visits, or hospital admissions.

bhttps://info.nhi.gov.tw/INAE5000/INAE5001S01 Accessed on January 10, 2025.

**eTable 4.** Anatomical Therapeutic Chemical (ATC) classification system codesa used to identify concurrent medication use at baseline

| Concurrent medications | ATC Classification System Codes |
| --- | --- |
| ACEIs or ARBs | C09 |
| Selective β blockers | C07AB, C07BB, C07CB, C07DB, C07EB, C07FB |
| Non-selective β blockers | C07AA, C07AG, C07BA, C07BG, C07CA, C07CG, C07DA, C07EA, C07FX |
| Dihydropyridine CCBs | C08CA |
| Non-dihydropyridine CCBs | C08DA, C08DB |
| Diuretics | C03, C07B, C07C, C07D, C08G |
| Other anti-hypertensive agents | C02 |
| Nitrates | C01DA |
| Anti-arrhythmic agents | C01B |
| Digoxin | C01AA |
| Aspirin | B01AC06, N02BA01 |
| Clopidogrel | B01AC04 |
| Warfarin | B01AA03 |
| Direct thrombin or factor Xa inhibitors | B01AE, B01AF |
| Statins | C10AA |
| Fibrates | C10AB |
| Urate-lowering agents | M04A |
| Febuxostat | M04AA03 |
| Insulin | A10A |
| Metformin | A10BA02, A10BD02, A10BD03, A10BD05, A10BD07, A10BD08, A10BD10, A10BD11, A10BD13-A10BD18, A10BD20, A10BD22, A10BD23, A10BD25, A10BD26 |
| Sulfonylureas | A10BB, A10BD01, A10BD02, A10BD04, A10BD06 |
| Glinides | A10BX02, A10BX03, A10BX08, A10BD14 |
| Thiazolidinedione | A10BG, A10BD03-A10BD06, A10BD09, A10BD12, A10BD26 |
| Alpha-glucosidase inhibitors | A10BF, A10BD17 |
| Dipeptidyl peptidase-4 inhibitors | A10BH, A10BD07-A10BD13, A10BD18, A10BD19, A10BD21, A10BD22, A10BD24, A10BD25 |
| Sodium-glucose cotransporter 2 Inhibitors | A10BK, A10BD15, A10BD16, A10BD19-A10BD21, A10BD23-A10BD25 |
| Glucagon-like peptide-1 receptor agonists | A10BJ |
| Thyroid-therapy drugs | H03 |
| Inhaled short-acting bronchodilators | SAMA: R03BB01, R03BB02  SABA: R03AC02-R03AC10, R03AC15-R03AC17  SAMA/SABA FDC: R03AL01, R03AL02 |
| LABA | R03AC12-R03AC14, R03AC18, R03AC19 |
| LAMA | R03BB04-R03BB08 |
| LABA/ICS FDC | R03AK06-R03AK12, R03AK14 |
| LAMA/LABA FDC | R03AL03-R03AL07, R03AL10 |
| ICS | R03BA |
| Systemic bronchodilators | Oral β-2 agonists: R03CC02-R03CC14, R03CC53, R03CC63, R03CC91  Oral xanthines: R03DA04, R03DA05 |
| Systemic corticosteroids | H02AB, H02BX |
| Oral antibiotics commonly used for COPD exacerbations | J01CA01, J01CA04, J01CA51, J01CR01, J01CR02, J01CR04, J01DC, J01DD, J01MA, J01FA, J01AA, J01EE01; restricted to oral dosage form |
| Histamine 2 antagonists or Proton pump inhibitors | A02BA, A02BC |
| COX-2 selective NSAIDs | M01AH |
| COX-2 nonselective NSAIDs | M01AA, M01AB, M01AC, M01AE, M01AG, M01AX |
| Anti-epileptics | N03 |
| Anti-depressants: | N06A |
| Anxiolytics | N05B |
| Hypnotics | N05C |
| Anti-psychotics | N05A |

ACEI, angiotensin converting enzyme inhibitor; ARB, angiotensin II receptor blocker; CCB, calcium channel blocker; COPD, chronic obstructive pulmonary disease; COX-2, cyclooxygenase-2; FDC, fixed-dose combination; ICS, inhaled corticosteroid; LABA, long-acting β2 agonists; LAMA, long-acting muscarinic antagonists; NSAID, non-steroidal anti-inflammatory drug; SABA, short-acting β2 agonists; SAMA, short-acting muscarinic antagonists.

aBased on pharmacy dispensing claims from outpatient visits, emergency department visits, or hospital admissions.

**eTable 5.** International Classification of Diseases, 10th Revision, Clinical Modification (ICD-10-CM) diagnosis or procedure codesa or Taiwan health insurance service claims codesa,b used to measure healthcare services at baseline

| Healthcare services | ICD-10-CM diagnosis or procedure codes or Taiwan health insurance services claims codes |
| --- | --- |
| Any outpatient visits | Not applicable |
| Outpatient visits due to cardiovascular disease | See codes for hypertension, ischemic heart disease or angina, myocardial infarction, coronary revascularization, cardiac dysrhythmia, congestive heart failure, cerebrovascular disease, ischemic stroke, hemorrhagic stroke, peripheral vascular disease, diabetes mellitus, hyperlipidemia in **eTable 3** |
| Outpatient visits due to COPD | ICD-10-CM diagnosis codes: J41-J44 |
| Any emergency department visits | Not applicable |
| Emergency department visits due to cardiovascular disease | See codes for hypertension, ischemic heart disease or angina, myocardial infarction, coronary revascularization, cardiac dysrhythmia, congestive heart failure, cerebrovascular disease, ischemic stroke, hemorrhagic stroke, peripheral vascular disease, diabetes mellitus, hyperlipidemia in **eTable 3** |
| Emergency department visits due to COPD | ICD-10-CM diagnosis codes: J41-J44 |
| Any hospitalizations | Not applicable |
| Hospitalizations due to cardiovascular disease | See codes for hypertension, ischemic heart disease or angina, myocardial infarction, coronary revascularization, cardiac dysrhythmia, congestive heart failure, cerebrovascular disease, ischemic stroke, hemorrhagic stroke, peripheral vascular disease, diabetes mellitus, hyperlipidemia in **eTable 3** |
| Hospitalizations due to COPD | ICD-10-CM diagnosis codes: J41-J44 |
| Pneumococcal or influenza vaccinations | Pneumococcal vaccination  Taiwan health insurance service claims codes: K000492206  Influenza vaccination  Taiwan health insurance service claims codes: J000113277, K000453265, K000453277, K000523206, K000523265, K000706206, K000889206, X000092206, X000090238, X000090221, X000091221, J000113265, K000901206, J000138206, K001036206, K001126206, X000209206  Case type: D2  Func seq no: 01, 1, IC01 |
| Echochardiography | Taiwan health insurance service claims codes: 18005B, 18005C, 18006B, 18006C, 18044B |
| Carotid ultrasonography | Taiwan health insurance service claims codes: 20013A, 20013B, 20013C |
| Transcranial ultrasonography | Taiwan health insurance service claims codes: 20026B |
| Lower extremity arterial ultrasonography | Taiwan health insurance service claims codes: 19002BD, 18008B, 18008C |
| 24-hour ECG examination, % | Taiwan health insurance service claims codes: 18019B, 18019C |
| BNP, proBNP, or NT-proBNP test | Taiwan health insurance service claims codes: 12193B, 12193C |
| Spirometry test | Taiwan health insurance service claims codes: 17003B, 17003C, 17006B, 17006C, 17007A, 17007B |

COPD, chronic obstructive pulmonary disease; BNP, B-type natriuretic peptide; ECG, electrocardiography; NT, n-terminal.

aBased on any diagnosis or procedure positions or health insurance services records in the claims of outpatient visits, emergency department visits, or hospital admissions.

bhttps://info.nhi.gov.tw/INAE5000/INAE5001S01 Accessed on January 10, 2025.

.

**eTable 6.** Distribution of LAMA/LABA/ICS FDC initiators and LABA/ICS FDC users by cohort entry year

|  | LAMA/LABA/ICS FDC | LABA/ICS FDC |
| --- | --- | --- |
|  | n=8,189 | n=50,182 |
| ***Cohort entry year, n (%)*** | | |
| 2019 | 248 (3.03) | 23,224 (46.28) |
| 2020 | 2,434 (29.72) | 9,865 (19.66) |
| 2021 | 2,701 (32.98) | 8,375 (16.69) |
| 2022 | 2,806 (34.27) | 8,718 (17.37) |

FDC, fixed-dose combination; ICS, inhaled corticosteroids; LABA, long-acting β2 agonists; LAMA, long-acting muscarinic antagonists.

**eTable 7.** Baseline patient characteristics by study treatment

| Variables | Before PS matching (n= 58,371) | | | After 1:10 variable-ratio PS matching (n=28,851) | | |
| --- | --- | --- | --- | --- | --- | --- |
| LAMA/LABA/ICS FDC | LABA/ICS FDC | Standardized mean difference | LAMA/LABA/ICS FDC | LABA/ICS FDC | Standardized mean difference |
|  | n=8,189 | n=50,182 |  | n=5,836 | n=23,015 |  |
|  |  |  |  | n=5,836a | n=5,836a |  |
| ***Demographics, mean (SD) or n (%)*** |  |  |  |  |  |  |
| Age, years | 70.52 (10.55) | 69.52 (12.62) | 0.086 | 70.11 (10.87) | 70.52 (11.57) | -0.037 |
| Male | 7,226 (88.24) | 33,948 (67.65) | 0.513 | 4,956 (84.92) | 4,947 (84.77) | 0.004 |
| COPD duration, daysb | 1481.25 (1026.42) | 1071.44 (908.02) | 0.423 | 1336.26 (1037.02) | 1325.42 (963.98) | 0.011 |
| ***Comorbidities, n (%)*** | | | | | | |
| Hypertension | 4,887 (59.68) | 29,983 (59.75) | -0.001 | 3,494 (59.87) | 3,512 (60.18) | -0.006 |
| Ischemic heart disease or angina | 2,394 (29.23) | 13,265 (26.43) | 0.063 | 1,718 (29.44) | 1,756 (30.09) | -0.014 |
| Myocardial infarction | 308 (3.76) | 1,432 (2.85) | 0.051 | 220 (3.77) | 218 (3.74) | 0.002 |
| Coronary revascularization | 219 (2.67) | 1,040 (2.07) | 0.040 | 156 (2.67) | 172 (2.95) | -0.017 |
| Cardiac dysrhythmia | 1,415 (17.28) | 8,108 (16.16) | 0.030 | 1,008 (17.27) | 1,073 (18.39) | -0.029 |
| Congestive heart failure | 1,532 (18.71) | 8,206 (16.35) | 0.062 | 1,060 (18.16) | 1,100 (18.85) | -0.018 |
| Cerebrovascular disease | 1,247 (15.23) | 8,188 (16.32) | -0.030 | 933 (15.99) | 985 (16.88) | -0.024 |
| Ischemic stroke | 609 (7.44) | 3,699 (7.37) | 0.003 | 448 (7.68) | 460 (7.88) | -0.008 |
| Hemorrhagic stroke | 179 (2.19) | 1,195 (2.38) | -0.013 | 138 (2.36) | 157 (2.69) | -0.021 |
| Peripheral vascular disease | 258 (3.15) | 1,505 (3.00) | 0.009 | 174 (2.98) | 179 (3.07) | -0.005 |
| Diabetes mellitus | 2,328 (28.43) | 14,844 (29.58) | -0.025 | 1,692 (28.99) | 1,716 (29.40) | -0.009 |
| Hyperlipidemia | 3,068 (37.46) | 19,961 (39.78) | -0.048 | 2,246 (38.49) | 2,258 (38.69) | -0.004 |
| Thyroid disease | 275 (3.36) | 2,100 (4.18) | -0.043 | 215 (3.68) | 227 (3.89) | -0.011 |
| Pneumonia | 1,214 (14.82) | 7,016 (13.98) | 0.024 | 881 (15.10) | 877 (15.03) | 0.002 |
| Influenza | 203 (2.48) | 2,230 (4.44) | -0.108 | 161 (2.76) | 161 (2.76) | NA |
| Acute bronchitis | 3,229 (39.43) | 22,196 (44.23) | -0.097 | 2,366 (40.54) | 2,385 (40.87) | -0.007 |
| COVID-19 | 420 (5.13) | 1,632 (3.25) | 0.094 | 296 (5.07) | 288 (4.93) | 0.006 |
| Post-COVID-19 | 40 (0.49) | 274 (0.55) | -0.008 | 27 (0.46) | 30 (0.51) | -0.007 |
| Chronic liver disease | 1,041 (12.71) | 6,634 (13.22) | -0.015 | 748 (12.82) | 731 (12.53) | 0.009 |
| Gastritis or peptic ulcer disease | 2,988 (36.49) | 19,199 (38.26) | -0.037 | 2,181 (37.37) | 2,189 (37.51) | -0.003 |
| Chronic kidney disease | 1,401 (17.11) | 7,587 (15.12) | 0.054 | 976 (16.72) | 997 (17.08) | -0.010 |
| Rheumatoid arthritis or osteoarthritis | 1,810 (22.10) | 13,437 (26.78) | -0.109 | 1,385 (23.73) | 1,407 (24.11) | -0.009 |
| Osteoporosis | 297 (3.63) | 2,600 (5.18) | -0.076 | 235 (4.03) | 230 (3.94) | 0.004 |
| Gout | 1,373 (16.77) | 8,010 (15.96) | 0.022 | 1,009 (17.29) | 1,040 (17.82) | -0.014 |
| Any cancer other than lung cancer | 1,139 (13.91) | 5,159 (10.28) | 0.111 | 751 (12.87) | 767 (13.14) | -0.008 |
| Lung cancer | 547 (6.68) | 1,830 (3.65) | 0.137 | 351 (6.01) | 353 (6.05) | -0.001 |
| Dementia | 555 (6.78) | 4,037 (8.04) | -0.048 | 418 (7.16) | 449 (7.69) | -0.020 |
| Seizure | 71 (0.87) | 362 (0.72) | 0.016 | 52 (0.89) | 53 (0.91) | -0.002 |
| Depressive disorder | 548 (6.69) | 3,873 (7.72) | -0.040 | 420 (7.20) | 421 (7.21) | -0.001 |
| Anxiety disorder | 1,059 (12.93) | 7,721 (15.39) | -0.070 | 796 (13.64) | 827 (14.17) | -0.015 |
| Psychotic disorder | 111 (1.36) | 815 (1.62) | -0.022 | 87 (1.49) | 91 (1.56) | -0.006 |
| Bipolar disorder | 122 (1.49) | 913 (1.82) | -0.026 | 98 (1.68) | 98 (1.68) | NA |
| ***Concurrent medication use, n (%)*** | | | | | | |
| ACEIs or ARBs | 3,769 (46.03) | 22,672 (45.18) | 0.017 | 2,738 (46.92) | 2,762 (47.33) | -0.008 |
| Selective β blockers | 2,264 (27.65) | 11,503 (22.92) | 0.109 | 1,607 (27.54) | 1,627 (27.88) | -0.008 |
| Non-selective β blockers | 1,081 (13.20) | 7,248 (14.44) | -0.036 | 828 (14.19) | 835 (14.31) | -0.003 |
| Dihydropyridine CCBs | 2,476 (30.24) | 15,176 (30.24) | NA | 1,764 (30.23) | 1,802 (30.88) | -0.014 |
| Non-dihydropyridine CCBs | 1,175 (14.35) | 6,088 (12.13) | 0.065 | 780 (13.37) | 788 (13.50) | -0.004 |
| Diuretics | 2,612 (31.90) | 13,814 (27.53) | 0.096 | 1,840 (31.53) | 1,887 (32.33) | -0.017 |
| Other anti-hypertensive agents | 976 (11.92) | 4,858 (9.68) | 0.072 | 663 (11.36) | 679 (11.63) | -0.009 |
| Nitrates | 1,563 (19.09) | 8,503 (16.94) | 0.056 | 1,127 (19.31) | 1,191 (20.41) | -0.027 |
| Anti-arrhythmic agents | 921 (11.25) | 4,337 (8.64) | 0.087 | 605 (10.37) | 642 (11.00) | -0.021 |
| Digoxin | 247 (3.02) | 1,283 (2.56) | 0.028 | 178 (3.05) | 190 (3.26) | -0.012 |
| Aspirin | 2,389 (29.17) | 13,605 (27.11) | 0.046 | 1,711 (29.32) | 1,768 (30.29) | -0.021 |
| Clopidogrel | 984 (12.02) | 5,078 (10.12) | 0.060 | 695 (11.91) | 686 (11.75) | 0.005 |
| Warfarin | 111 (1.36) | 721 (1.44) | -0.007 | 84 (1.44) | 81 (1.39) | 0.004 |
| Direct thrombin or factor Xa inhibitors | 609 (7.44) | 2,947 (5.87) | 0.063 | 402 (6.89) | 428 (7.33) | -0.017 |
| Statins | 2,643 (32.28) | 15,710 (31.31) | 0.021 | 1,894 (32.45) | 1,876 (32.15) | 0.007 |
| Fibrates | 287 (3.50) | 2,118 (4.22) | -0.037 | 225 (3.86) | 243 (4.16) | -0.016 |
| Urate-lowering agents | 1,516 (18.51) | 7,939 (15.82) | 0.071 | 1,070 (18.33) | 1,078 (18.47) | -0.004 |
| Febuxostat | 557 (6.80) | 2,658 (5.30) | 0.063 | 389 (6.67) | 413 (7.08) | -0.016 |
| Insulin | 978 (11.94) | 4,675 (9.32) | 0.085 | 650 (11.14) | 676 (11.58) | -0.014 |
| Metformin | 1,458 (17.80) | 9,000 (17.93) | -0.003 | 1,052 (18.03) | 1,040 (17.82) | 0.005 |
| Sulfonylurea | 730 (8.91) | 4,876 (9.72) | -0.028 | 540 (9.25) | 558 (9.56) | -0.011 |
| Glinides | 220 (2.69) | 1,287 (2.56) | 0.008 | 157 (2.69) | 159 (2.72) | -0.002 |
| Thiazolidinedione | 254 (3.10) | 1,478 (2.95) | 0.009 | 191 (3.27) | 198 (3.39) | -0.007 |
| Alpha-glucosidase inhibitors | 202 (2.47) | 1,265 (2.52) | -0.003 | 153 (2.62) | 150 (2.57) | 0.003 |
| Dipeptidyl peptidase-4 inhibitors | 1,087 (13.27) | 6,306 (12.57) | 0.021 | 776 (13.30) | 782 (13.40) | -0.003 |
| Sodium-glucose cotransporter 2 Inhibitors | 381 (4.65) | 1,775 (3.54) | 0.056 | 271 (4.64) | 265 (4.54) | 0.005 |
| Glucagon-like peptide-1 receptor agonists | 29 (0.35) | 194 (0.39) | -0.005 | 21 (0.36) | 17 (0.29) | 0.012 |
| Thyroid-therapy drugs | 244 (2.98) | 1,772 (3.53) | -0.031 | 191 (3.27) | 200 (3.43) | -0.009 |
| Inhaled short-acting bronchodilators | 4,876 (59.54) | 19,762 (39.38) | 0.412 | 3,141 (53.82) | 3,158 (54.11) | -0.006 |
| LABA | 105 (1.28) | 362 (0.72) | 0.056 | 73 (1.25) | 92 (1.58) | -0.028 |
| LAMA | 715 (8.73) | 3,418 (6.81) | 0.072 | 550 (9.42) | 606 (10.38) | -0.032 |
| LABA/ICS FDC | 265 (3.24) | 18,896 (37.65) | -0.944 | 265 (4.54) | 286 (4.90) | -0.017 |
| LAMA/LABA FDC | 5,736 (70.05) | 5,066 (10.10) | 1.546 | 3,386 (58.02) | 3,403 (58.31) | -0.006 |
| ICS | 1,167 (14.25) | 1,176 (2.34) | 0.442 | 430 (7.37) | 383 (6.56) | 0.032 |
| Systemic bronchodilators | 6,121 (74.75) | 35,507 (70.76) | 0.090 | 4,304 (73.75) | 4,328 (74.16) | -0.009 |
| Systemic corticosteroids | 5,413 (66.10) | 29,433 (58.65) | 0.154 | 3,808 (65.25) | 3,824 (65.52) | -0.006 |
| Oral antibiotics commonly used for COPD exacerbations | 5,101 (62.29) | 30,942 (61.66) | 0.013 | 3,654 (62.61) | 3,716 (63.67) | -0.022 |
| Histamine 2 antagonists or Proton pump inhibitors | 4,981 (60.83) | 29,289 (58.37) | 0.050 | 3,575 (61.26) | 3,602 (61.72) | -0.010 |
| COX-2 selective NSAIDs | 1,701 (20.77) | 10,960 (21.84) | -0.026 | 1,258 (21.56) | 1,294 (22.17) | -0.015 |
| COX-2 nonselective NSAIDs | 4,839 (59.09) | 32,978 (65.72) | -0.137 | 3,613 (61.91) | 3,603 (61.74) | 0.004 |
| Anti-epileptics | 1,360 (16.61) | 8,646 (17.23) | -0.017 | 1,003 (17.19) | 1,028 (17.61) | -0.011 |
| Anti-depressants: | 1,159 (14.15) | 7,767 (15.48) | -0.037 | 891 (15.27) | 861 (14.75) | 0.014 |
| Anxiolytics | 3,469 (42.36) | 22,592 (45.02) | -0.054 | 2,536 (43.45) | 2,605 (44.64) | -0.024 |
| Hypnotics | 2,121 (25.90) | 12,259 (24.43) | 0.034 | 1,508 (25.84) | 1,506 (25.81) | 0.001 |
| Anti-psychotics | 1,467 (17.91) | 8,942 (17.82) | 0.002 | 1,060 (18.16) | 1,117 (19.14) | -0.025 |
| ***Healthcare services, mean (SD) or n (%)*** | | | | | | |
| No. of outpatient visits | 40.45 (26.22) | 39.61 (25.81) | 0.032 | 40.35 (26.99) | 40.44 (25.90) | -0.003 |
| No. of outpatient visits due to cardiovascular diseasec | 12.01 (12.69) | 11.74 (12.65) | 0.021 | 11.93 (12.76) | 11.83 (12.22) | 0.008 |
| No. of outpatient visits due to COPD | 9.67 (8.66) | 6.29 (7.38) | 0.420 | 8.30 (8.04) | 8.12 (8.58) | 0.021 |
| No. of emergency department visits | 1.26 (2.36) | 1.00 (2.11) | 0.118 | 1.24 (2.39) | 1.29 (2.45) | -0.019 |
| No. of emergency department visits due to cardiovascular diseasec | 0.26 (0.86) | 0.22 (0.83) | 0.045 | 0.26 (0.90) | 0.27 (0.82) | -0.012 |
| No. of emergency department visits due to COPD | 0.30 (1.03) | 0.14 (0.71) | 0.177 | 0.26 (1.02) | 0.26 (0.88) | -0.006 |
| No. of hospitalizations | 0.86 (1.56) | 0.63 (1.33) | 0.159 | 0.81 (1.51) | 0.83 (1.56) | -0.015 |
| No. of hospitalizations due to cardiovascular diseasec | 0.60 (1.31) | 0.46 (1.11) | 0.118 | 0.57 (1.26) | 0.58 (1.26) | -0.012 |
| No. of hospitalizations due to COPD | 0.49 (1.14) | 0.25 (0.77) | 0.250 | 0.40 (0.99) | 0.41 (1.05) | -0.010 |
| Pneumococcal or influenza vaccinations | 5,055 (61.73) | 24,619 (49.06) | 0.257 | 3,361 (57.59) | 3,389 (58.07) | -0.010 |
| Echocardiography | 2,888 (35.27) | 14,181 (28.26) | 0.151 | 2,016 (34.54) | 2,066 (35.40) | -0.018 |
| Carotid ultrasonography | 535 (6.53) | 3,408 (6.79) | -0.01 | 392 (6.72) | 409 (7.01) | -0.012 |
| Transcranial ultrasonography | 327 (3.99) | 2,009 (4.00) | -0.001 | 238 (4.08) | 235 (4.03) | 0.003 |
| Lower extremity arterial ultrasonography | 84 (1.03) | 495 (0.99) | 0.004 | 64 (1.10) | 74 (1.27) | -0.016 |
| 24-hour ECG examination | 511 (6.24) | 3,034 (6.05) | 0.008 | 366 (6.27) | 425 (7.28) | -0.040 |
| BNP, proBNP, or NT-proBNP test | 2,462 (30.06) | 9,902 (19.73) | 0.241 | 1,641 (28.12) | 1,721 (29.49) | -0.030 |
| Spirometry test | 5,557 (67.86) | 22,442 (44.72) | 0.480 | 3,690 (63.23) | 3,755 (64.34) | -0.023 |

ACEI, angiotensin converting enzyme inhibitor; ARB, angiotensin receptor blocker; BNP, B-type natriuretic peptide; CCB, calcium channel blocker; COPD, chronic obstructive pulmonary disease; COVID, coronavirus disease; COX-2, cyclooxygenase-2; FDC, fixed-dose combination; ICS, inhaled corticosteroids; LABA, long-acting β2 agonists; LAMA, long-acting muscarinic antagonists; NA, not applicable; NSAID, non-steroidal anti-inflammatory drug; NT, n-terminal; PS, propensity score; SD, standard deviation.

aOne LABA/LAMA/ICS FDC initiator versus one randomly sampled LABA/ICS FDC user in each matched subset.

bCOPD duration was defined as the duration from the earliest recorded date of COPD diagnosis (looking back until 2014/01/01) to the cohort entry date.

cCardiovascular disease included hypertension, ischemic heart disease or angina, myocardial infarction, coronary revascularization, cardiac dysrhythmia, congestive heart failure, cerebrovascular disease, ischemic stroke, hemorrhagic stroke, transient ischemic attack, peripheral vascular disease, diabetes mellitus, and hyperlipidemia.

**eTable 8.** Composite cardiovascular events and HR comparing LAMA/LABA/ICS FDC to LABA/ICS FDC by underlying disease, baseline characteristics, and prior maintenance medication use

|  | Before PS matching | | | After 1:10 variable-ratio PS matching | | | |
| --- | --- | --- | --- | --- | --- | --- | --- |
|  | LAMA/LABA/ICS FDC | LABA/ICS FDC | Crude HR  (95% CI) | LAMA/LABA/ICS FDC | LABA/ICS FDC | HR after 1:10 variable-ratio PS matching  (95% CI)a | P value for test of homogeneity |
| Events/Patients | | Events/Patients | |
| ***Prior hospitalized cardiovascular episodes*** | | | | | | | |
| Yes | 79/2,551 | 356/12,485 | 0.89 (0.69, 1.13) | 61/1,969 | 173/6,662 | 0.86 (0.62, 1.20) | 0.239 |
| No | 79/5,638 | 385/37,697 | 1.06 (0.83, 1.36) | 50/3,835 | 146/15,958 | 1.16 (0.80, 1.68) |
| ***Prior hospitalized COPD exacerbations*** | | | | | | | |
| Yes | 67/2,248 | 221/7,657 | 0.87 (0.66, 1.15) | 46/1,488 | 103/4,045 | 0.93 (0.62, 1.39) | 0.642 |
| No | 91/5,941 | 520/42,525 | 0.97 (0.77, 1.21) | 66/4,256 | 211/18,535 | 1.05 (0.77, 1.44) |
| ***Prior COVID-19 episodes*** | | | | | | | |
| Yes | 6/420 | 16/1,632 | 1.23 (0.48, 3.18) | <5/275 | 11/912 | 0.64 (0.18, 2.23) | 0.492 |
| No | 152/7,769 | 725/48,550 | 1.01 (0.85, 1.21) | 109/5,541 | 309/21,973 | 1.00 (0.77, 1.28) |
| ***Age*** | | | | | | | |
| ≥ 65 years | 134/5,721 | 610/32,055 | 1.01 (0.84, 1.22) | 86/4,040 | 250/15,305 | 0.94 (0.71, 1.24) | 0.659 |
| < 65 years | 24/2,468 | 131/18,127 | 1.05 (0.68, 1.64) | 17/1,744 | 65/7,434 | 1.09 (0.60, 1.98) |
| ***Sex*** | | | | | | | |
| Male | 141/7,226 | 548/33,948 | 0.95 (0.79, 1.15) | 95/4,927 | 269/18,350 | 1.00 (0.76, 1.32) | 0.865 |
| Female | 17/963 | 193/16,234 | 1.28 (0.78, 2.11) | 14/876 | 55/4,444 | 0.94 (0.49, 1.81) |
| ***COPD duration*** | | | | | | | |
| < 3 years | 57/3,115 | 335/25,512 | 1.09 (0.82, 1.45) | 47/2,655 | 160/11,640 | 0.91 (0.63, 1.31) | 0.470 |
| 3-5 years | 37/1,411 | 208/11,285 | 1.24 (0.87, 1.77) | 23/986 | 69/3,775 | 0.76 (0.44, 1.31) |
| > 5 years | 64/3,663 | 198/13,385 | 0.92 (0.69, 1.22) | 36/2,109 | 77/6,907 | 1.18 (0.74, 1.89) |
| ***Prior use of LABA/ICS FDC*** | | | | | | | |
| Yes | 8/265 | 378/18,896 | 1.90 (0.94, 3.83) | 8/254 | 47/2,067 | 1.06 (0.48, 2.37) | 0.837 |
| No | 150/7,924 | 363/31,286 | 0.99 (0.81, 1.21) | 104/5,535 | 274/20,847 | 0.97 (0.75, 1.26) |
| ***Prior use of LAMA containing regimens*** | | | | | | | |
| Yes | 118/6,027 | 111/7,861 | 0.85 (0.65, 1.11) | 75/3,548 | 89/6,729 | 1.16 (0.82, 1.65) | 0.237 |
| No | 40/2,162 | 630/42,321 | 1.43 (1.04, 1.97) | 39/2,148 | 232/15,543 | 0.86 (0.60, 1.22) |

COPD, chronic obstructive pulmonary disease; CI, confidence interval; FDC, fixed-dose combination; HR, hazards ratio; ICS, Inhaled corticosteroids; LABA, long-acting β2 agonists; LAMA, long-acting muscarinic antagonists; NA, not applicable; PS, propensity score.

aThe HR after PS matching was stratified on the inverse of the matching ratio.

**eTable 9.** Composite cardiovascular events and HR comparing LAMA/LABA/ICS FDC to LABA/ICS FDC by individual study treatment

|  | Before PS matching | | | After 1:10 variable-ratio PS matching | | | |
| --- | --- | --- | --- | --- | --- | --- | --- |
|  | LAMA/LABA/ICS FDC | LABA/ICS FDC | Crude HR  (95% CI) | LAMA/LABA/ICS FDC | LABA/ICS FDC | HR after 1:10 variable-ratio PS matching  (95% CI)a | P value for test of homogeneity |
| Events/Patients | | Events/Patients | |
| ***UME/VIL/FLU versus*** | | | | | | | |
| FOR/BEC | 112/5,840 | 197/13,501 | 0.85 (0.67, 1.08) | 47/2,348 | 111/8,247 | 1.03 (0.70, 1.52) | 0.946 |
| FOR/BUD | 112/5,840 | 205/15,171 | 0.97 (0.77, 1.22) | 47/2,580 | 106/8,659 | 0.96 (0.64, 1.43) |
| FOR/FLUb | 112/5,840 | 6/405 | 0.68 (0.30, 1.56) | 20/995 | <5/243 | 1.35 (0.35, 5.19) |
| SAL/FLU | 112/5,840 | 222/10,619 | 0.79 (0.62, 0.99) | 37/1,970 | 98/5,638 | 0.96 (0.63, 1.47) |
| VIL/FLU | 112/5,840 | 111/10,486 | 1.29 (0.99, 1.69) | 47/2,579 | 76/7,364 | 1.17 (0.78, 1.77) |
| ***GLY/FOR/BEC versus*** | | | | | | | |
| FOR/BEC | 46/2,349 | 197/13,501 | 1.22 (0.88, 1.69) | 29/1,759 | 103/7,303 | 0.75 (0.47, 1.19) | 0.927 |
| FOR/BUD | 46/2,349 | 205/15,171 | 1.48 (1.07, 2.04) | 30/1,899 | 105/7,554 | 0.78 (0.50, 1.24) |
| FOR/FLUb | 46/2,349 | 6/405 | 1.06 (0.45, 2.50) | 12/923 | <5/239 | 1.65 (0.33, 8.30) |
| SAL/FLU | 46/2,349 | 222/10,619 | 1.15 (0.83, 1.58) | 29/1,550 | 89/5,326 | 0.82 (0.51, 1.33) |
| VIL/FLU | 46/2,349 | 111/10,486 | 1.90 (1.34, 2.68) | 21/1,636 | 72/6,176 | 0.83 (0.49, 1.42) |

BEC, beclomethasone; BUD, budesonide; CI, confidence interval; FDC, fixed-dose combination; FOR, formoterol; FLU, fluticasone; GLY, glycopyrronium; HR, hazards ratio; ICS, inhaled corticosteroids; LABA, long-acting β2 agonists; LAMA, long-acting muscarinic antagonists; PS, propensity score; SAL, salmeterol; UME, umeclidinium; VIL, vilanterol.

aThe HR after PS matching was stratified on the inverse of the matching ratio.

bFor UME/VIL/FLU (or GLY/FOR/BEC) versus FOR/FLU, we analyzed using 10:1 variable ratio PS matching.

**eTable 10.** Composite cardiovascular events and HR comparing LAMA/LABA/ICS FDC to LABA/ICS FDC by treatment duration of LAMA/LABA/ICS FDC

|  | Before PS matching | | | After 1:10 variable-ratio PS matching | | | |
| --- | --- | --- | --- | --- | --- | --- | --- |
|  | LAMA/LABA/ICS FDC | LABA/ICS FDC | Crude HR  (95% CI) | LAMA/LABA/ICS FDC | LABA/ICS FDC | HR after 1:10 variable-ratio PS matching  (95% CI)a | P value for test of homogeneity |
| Events/Patients | | Events/Patients | |
| 1-90 days | 72/8,189 | 354/50,182 | 1.23 (0.96, 1.59) | 55/5,836 | 180/23,015 | 1.18 (0.85, 1.65) | 0.238 |
| 91-180 days | 23/6,130 | 101/27,271 | 0.94 (0.60, 1.48) | 10/3,235 | 58/11,902 | 0.60 (0.29, 1.22) |
| 181-365 days | 34/4,498 | 104/16,032 | 1.09 (0.74, 1.60) | 11/1,928 | 43/6,791 | 0.71 (0.34, 1.46) |
| >365 days | 29/2,769 | 182/8,748 | 0.72 (0.48. 1.07) | 11/942 | 60/3,010 | 0.76 (0.38, 1.54) |

CI, confidence interval; FDC, fixed-dose combination; HR, hazards ratio; ICS, inhaled corticosteroids; LABA, long-acting β2 agonists; LAMA, long-acting muscarinic antagonists; PS, propensity score.

aThe HR after PS matching was stratified on the inverse of the matching ratio.

**eTable 11.** Composite cardiovascular events and HR comparing LAMA/LABA/ICS FDC to LABA/ICS FDC in different sensitivity analyses

|  | Before PS matching | | | After 1:10 variable-ratio PS matching | | |
| --- | --- | --- | --- | --- | --- | --- |
|  | LAMA/LABA/ICS FDC | LABA/ICS FDC | Crude HR  (95%CI) | LAMA/LABA/ICS FDC | LABA/ICS FDC | HR after 1:10 variable-ratio PS (95%CI)a |
|  | Events/Patients | | Events/Patients | |
| ***Main analysisb*** | 158/8,189 | 741/50,182 | 1.03 (0.86, 1.22) | 117/5,836 | 316/23,015 | 1.00 (0.78, 1.28) |
| ***Sensitivity analysis*** |  |  |  |  |  |  |
| A grace period of 90 daysb | 170/8,189 | 827/50,182 | 1.05 (0.89, 1.24) | 127/5,836 | 358/23,015 | 1.02 (0.80, 1.28) |
| Intention-to-treat approach | 244/8,189 | 1,988/50,182 | 1.13 (0.99, 1.29) | 178/5,836 | 894/23,015 | 1.00 (0.84, 1.20) |
| Fine-Gray approachb | 158/8,189 | 741/50,182 | 1.08 (0.91, 1.29) | 117/5,836 | 316/23,015 | 1.09 (0.86, 1.39) |
| Restricting to patients with cohort entry year between 2019 and 2021b | 125/5,383 | 661/41,464 | 1.00 (0.82, 1.21) | 83/3,914 | 236/15,834 | 0.96 (0.72, 1.29) |
| hd-PS approachb | 158/8,189 | 741/50,182 | 1.03 (0.86, 1.22) | 107/5,818 | 310/22,801 | 0.91 (0.70, 1.17) |
| Multiple imputationb | 158/8,189 | 741/50,182 | 1.03 (0.86, 1.22) | 108/5,675 | 309/21,911 | 1.02 (0.75, 1.38) |

CI, confidence interval; FDC, fixed-dose combination; hd-PS, high-dimensional propensity score; HR, hazards ratio; ICS, inhaled corticosteroids; LABA, long-acting β2 agonists; LAMA, long-acting muscarinic antagonists; PS, propensity score.

aThe HR after PS matching was stratified on the inverse of the matching ratio.

bBased on an on-treatment approach.

**eTable 12.** Follow-up, incidence rate, and HR of composite cardiovascular events comparing LAMA/LABA/ICS FDC to LABA/ICS FDC based on an intention-to-treat approach

|  | Before PS matching  (n= 58,371) | | After 1:10 variable-ratio PS matching (n=28,851) | |
| --- | --- | --- | --- | --- |
|  | LAMA/LABA/ICS FDC  (n=8,189) | LABA/ICS FDC  (n=50,182) | LAMA/LABA/ICS FDC  (n=5,836) | LABA/ICS FDC  (n=23,015) |
| Number of events | 244 | 1,988 | 178 | 894 |
| Mean follow-up days (SD) | 475.93 (320.60) | 805.89 (480.08) | 467.06 (315.56) | 697.22 (450.77) |
| Incidence ratea (95%CI) | 22.87 (20.17-25.92) | 17.95 (17.18-18.76) | 23.85 (20.59-27.63) | 21.55 (18.92-24.53) |
| HR (95% CI)b | 1.13 (0.99, 1.29) | Ref | 1.00 (0.84, 1.20) | Ref |

CI, confidence interval; FDC, fixed-dose combination; ICS, inhaled corticosteroids; LABA, long-acting β2 agonists; LAMA, long-acting muscarinic antagonists; PS, propensity score; SD, standard deviation.

aThe unit of incidence rate was per 1,000 person-years. The incidence rate after 1:10 PS matching was weighted by the inverse of the matching ratio.

bThe HR after 1:10 PS matching was stratified on the matching ratio.

**eTable 13.** Number (%) of patients with corresponding baseline clinical measurementsa

| No. (%) of patients with information | LAMA/LABA/ICS FDC | LABA/ICS FDC | Total study cohort |
| --- | --- | --- | --- |
| n=8,189 | n=50,182 | n=58,371 |
|  | Any clinical measurements | | |
| ≥ One clinical parameter | 7,509 (91.70) | 41,248 (82.20) | 48,757 (83.53) |
|  | Laboratory examinations | | |
| ≥ One test result | 7,160 (87.43) | 40,763 (81.23) | 47,923 (82.10) |
| Eosinophil | 5,467 (66.76) | 27,456 (54.71) | 32,923 (56.40) |
| C-reactive protein | 3,454 (42.18) | 16,672 (33.22) | 20,126 (34.48) |
| LDL-cholesterol | 4,296 (52.46) | 25,425 (50.67) | 29,721 (50.92) |
| HbA1c | 3,987 (48.69) | 22,341 (44.52) | 26,328 (45.10) |
| GFR or eGFR | 6,838 (83.50) | 38,605 (76.93) | 45,443 (77.85) |
|  | Lung function test, respiratory symptoms, blood pressure,  or health behavior | | |
| ≥ One test result | 2,271 (27.73) | 2,849 (5.68) | 5,120 (8.77) |
| Predicted post-dose FEV1 predicted | 1,714 (20.93) | 2,333 (4.65) | 4,047 (6.93) |
| Post-dose FEV1/FVC | 1,715 (20.94) | 2,330 (4.64) | 4,045 (6.93) |
| CAT score | 1,998 (24.40) | 2,207 (4.40) | 4,205 (7.20) |
| SBP | 2,031 (24.80) | 2,258 (4.50) | 4,289 (7.35) |
| BMI | 2,030 (24.79) | 2,253 (4.49) | 4,283 (7.34) |
| Smoking status | 2,032 (24.81) | 2,258 (4.50) | 4,290 (7.35) |

BMI, body mass index; CAT, COPD Assessment Test; COPD, chronic obstructive pulmonary disease; eGFR, estimated glomerular filtration rate; FDC, fixed-dose combination; FEV1, forced expiratory volume in one second; FVC, forced vital capacity; GFR, glomerular filtration rate; HbA1c, glycated hemoglobin; ICS, inhaled corticosteroids; LABA, long-acting β2 agonists; LAMA, long-acting muscarinic antagonists; LDL, low-density lipoprotein; NHI, National Health Insurance; P4P, pay for performance; SBP, systolic blood pressure.

aCaptured within 365 days prior to cohort entry

**eTable 14.** Baseline clinical measurements after imputationa

|  | Before PS matching (n=58,371) | | | After 1:10 variable-ratio PS matching (n=28,051) | | |
| --- | --- | --- | --- | --- | --- | --- |
| LAMA/LABA/ICS FDC | LABA/ICS FDC | Standardized mean difference | LAMA/LABA/ICS FDC | LABA/ICS FDC | Standardized mean difference |
| n=8,189 | n=50,182 | n=5,730 | n=22,321 |
|  |  | n=5,730b | n=5,730b |
|  | Laboratory examinations | | | | | |
| Eosinophil, %, mean (SD) | 3.02 (3.26) | 2.94 (3.29) | 0.02 | 3.01 (3.30) | 3.05 (3.47) | -0.01 |
| C-reactive protein, mg/dL, mean (SD) | 1.94 (4.19) | 2.05 (4.25) | -0.03 | 1.99 (4.32) | 1.93 (4.22) | 0.01 |
| LDL-cholesterol, mg/dL, mean (SD) | 98.26 (33.09) | 102.43 (33.11) | -0.13 | 99.07 (33.38) | 99.09 (32.91) | <0.01 |
| HbA1c, %, mean (SD) | 6.13 (1.08) | 6.15 (1.11) | -0.02 | 6.14 (1.07) | 6.15 (1.12) | -0.01 |
| GFR or eGFR, mL/min, mean (SD) | 79.81 (30.14) | 79.21 (29.40) | 0.02 | 79.27 (30.61) | 79.07 (29.69) | 0.01 |
|  | Lung function test, respiratory symptoms, blood pressure, or health behavior | | | | | |
| Predicted post-dose FEV1, %, mean (SD) | 58.14 (22.05) | 66.01 (21.70) | -0.36 | 61.19 (21.92) | 61.44 (21.62) | -0.01 |
| Post-dose FEV1/FVC, %, mean (SD) | 56.69 (13.43) | 63.50 (13.38) | -0.51 | 59.08 (13.09) | 58.98 (13.19) | 0.01 |
| CAT score, mean (SD) | 12.01 (6.60) | 11.52 (6.69) | 0.07 | 11.85 (6.50) | 11.94 (6.74) | -0.01 |
| SBP, mmHg, mean (SD) | 133.70 (17.79) | 133.30 (18.01) | 0.02 | 133.50 (17.76) | 133.79 (18.13) | -0.02 |
| BMI, kg/m2, mean (SD) | 23.73 (4.25) | 24.29 (4.29) | -0.13 | 23.93 (4.26) | 23.91 (4.36) | <0.01 |
| Smoking status, n (%) |  |  |  |  |  |  |
| Never smoker | 1,181 (14.42) | 17,874 (35.62) | -0.5 | 1,017 (17.75) | 1,027 (17.92) | <0.01 |
| Ex-smoker | 4,590 (56.05) | 20,133 (40.12) | 0.32 | 3,026 (52.81) | 3,036 (52.98) | <0.01 |
| Current smoker | 2,418 (29.53) | 12,175 (24.26) | 0.12 | 1,687 (29.44) | 1,667 (29.09) | 0.01 |

BMI, body mass index; CAT, COPD Assessment Test; eGFR, estimated glomerular filtration rate; FDC, fixed-dose combination; FEV1, forced expiratory volume in one second; FVC, forced vital capacity; GFR, glomerular filtration rate; HbA1c, glycated hemoglobin; ICS, inhaled corticosteroids; LABA, long-acting β2 agonists; LAMA, long-acting muscarinic antagonists; LDL, low-density lipoprotein; PS, propensity score; SBP, systolic blood pressure; SD, standard deviation.

aOne randomly sampled dataset from 10 imputed datasets.

bOne randomly sampled LABA/LAMA/ICS FDC initiator versus one LABA/ICS FDC initiator in each matched subset.

**eTable 15**. Comparison between IMPACT, ETHOS, TRILOGY trials and the present study

|  | IMPACT trial | ETHOS trial | TRILOGY trial | The present study |
| --- | --- | --- | --- | --- |
|  | Lipson DA, NEJM 2018[7] | Rabe KF, NEJM 2020[8] | Sing D, Lancet 2016[9] |  |
|  | Total (n=10,355) | Total (n=8,509) | Total (n=1,367) | PS-matched cohort (n=28,851) |
| Treatment groups (sample size) | * LAMA/LABA/ICS FDC (n=4,151)  * LABA/ICS FDC (n=4,134)  * LAMA/LABA FDC (n=2,070) | * LAMA/LABA/ICS FDC (n=4,258)  * LABA/ICS FDC (n=2,131)  * LAMA/LABA FDC (n=2,120) | * LAMA/LABA/ICS FDC (n=687)  * LABA/ICS FDC (n=611) | LAMA/LABA/ICS FDC (n=5,336)  LABA/ICS FDC (n=23,015) |
|  | Demographics and respiratory-related characteristics | | | |
| Age, years, mean (SD) | 65.3 (8.2) | 64.6 (7.6) | 63.5 (8.0) | 70.3 (11.2)a |
| Male | 66.3% | 59.7% | 75.8% | 84.9%a |
| CAT score, mean (SD) | 20.1 (6.1) | 19.6 (6.6) | 20.8 (5.8) | 11.9 (6.6)b |
| FEV1, mean (SD) | 45.5 (14.8) | 43.4 (10.3) | 36.6 (8.5) | 61.3 (21.8)b |
| Severe exacerbation history | 25.8% | 21.2% | NA | 19.5%a |
|  | Composite cardiovascular events comparing LAMA/LABA/ICS FDC versus LABA/ICS FDC | | | |
| Relative risk (95% CI) or % in each group | NA | Myocardial infarction, stroke, and cardiovascular death:  HR: 1.25 (0.73-2.15) | Myocardial infarction, stroke, arrhythmia, heart failure, and cardiovascular death:  2.2% versus 2.5% | Myocardial infarction, unstable angina, heart failure, cardiac dysrhythmia, and ischemic stroke:  HR: 1.00 (0.78-1.28)c |
|  | Individual cardiovascular events comparing LAMA/LABA/ICS FDC versus LBAM/ICS FDC | | | |
| Relative risk (95% CI) or % in each group | Ischemic heart disease:  Rate ratio: 1.41 (1.03-1.93)  Cerebrovascular conditions:  Rate ratio: 1.30 (0.83-2.05) | Myocardial infarction:  0.4% versus 0.4%  Stroke:  0.6% versus 0.3%  Cardiovascular death:  0.5% versus 0.5% | Serious treatment-emergent ischemic heart disease: 0.3% versus 1.8%  Serious treatment-emergent cardiac failure: 0.7% versus 0.8% | Myocardial infarction:  HR: 1.02 (0.62-1.68)c  Unstable angina  HR: 0.54 (0.10-2.87)c  Ischemic stroke  HR: 0.82 (0.53-1.28)c  Congestive heart failure  HR: 1.21 (0.81-1.81)c  Cardiac dysrhythmia  HR: 0.70 (0.25-1.95)c |

CAT, COPD Assessment Test; CI, confidence interval; FDC, fixed-dose combination; FEV1, forced expiratory volume in one second; HR, hazard ratio; ICS, Inhaled corticosteroids; LABA, long-acting β2 agonists; LAMA, long-acting muscarinic antagonists; MI, myocardial infarction;NA, not available; PS, propensity score.

aBased on data after PS matching (see **Table 1** or **eTable7**).

bBased on imputed data after PS matching (see **eTable 14**).

cBased on HR after PS matching (see **Table 2**).

**eFigure 1.** Visualization of the research framework.

COPD, chronic obstructive pulmonary disease; FDC, fixed-dose combination; ICS, inhaled corticosteroids; LABA, long-acting β2 agonists; LAMA, long-acting muscarinic antagonists.

**eFigure 2.** Flow chart of cohort identification.

|  | |  |  |
| --- | --- | --- | --- |
| Patients with a COPD diagnosis during 2019/01/01~2022/12/31 (n=1,337,947) | |  | |
|  |  |  |  |
|  |  | Excluded due to   - Age <40 years or age >100 years on the COPD diagnosis date (n=181,045) - Ambiguous information on age and sex (n=12) - Patients who did not receive LAMA/LABA/ICS FDC or LABA/ICS FDC after the COPD diagnosis date during 2019/07/01-2022/12/31 (n=954,347) | |
|  |
|  |  |  |  |
| Patients with COPD who received LAMA/LABA/ICS FDC or LABA/ICS FDC during 2019/07/01-2022/12/31 (n=202,543) | |  |  |
|  |  |  |  |
|  |  | Excluded due to   - Patients who did not have interactions with the healthcare system within 365 days before cohort entry (n=260) - Patients who received LAMA/LABA/ICS FDC within 365 days before cohort entry (n=0) - Patients who simultaneously received LAMA/LABA/ICS FDC and LABA/ICS FDC at cohort entry (n=40) - Patients who received LAMA containing regimens at cohort entry (for LABA/ICS users) (n=28,221) - Patients who received more than one LAMA/LABA/ICS FDC or more than one LABA/ICS FDC at cohort entry (n=99) - Patients who had an asthma diagnosis within 365 days before or at cohort entry (n=115,444) - Patients who had death records before or at cohort entry (n=98) - Patients who were censored at cohort entry (n=10) | |
|  |  |
|  |  |  |  |
| Eligible study patients (n=58,371)   - LAMA/LABA/ICS FDC initiators (n=8,189)   - UMEC/VIL/FLU (n=5,840)  - GLY/FOR/BEC (n=2,349)   - LABA/ICS users (n=50,182)   - FOR/BUD (n=15,171)  - FOR/BEC (n=13,501)  - SAL/FLU (n=10,619)  - VIL/FLU (n=10,486)  - FOR/FLU (n=405) | |  |  |

BEC, beclomethasone; BUD, budesonide; COPD, chronic obstructive pulmonary disease; FDC, fixed-dose combination; FLU, fluticasone; FOR, formoterol; GLY, glycopyrronium; ICS, inhaled corticosteroid; LABA, long-acting β-agonist; LAMA, long-acting muscarinic antagonist; SAL, salmeterol; UME, umeclidinium; VIL, vilanterol.

**eFigure 3.** PSplots for LAMA/LABA/ICS FDC and LABA/ICS FDC. (a) Before PS matching (c-statistics=0.902). (b) After 1:10 variable-ratio PS matchinga.

1. **
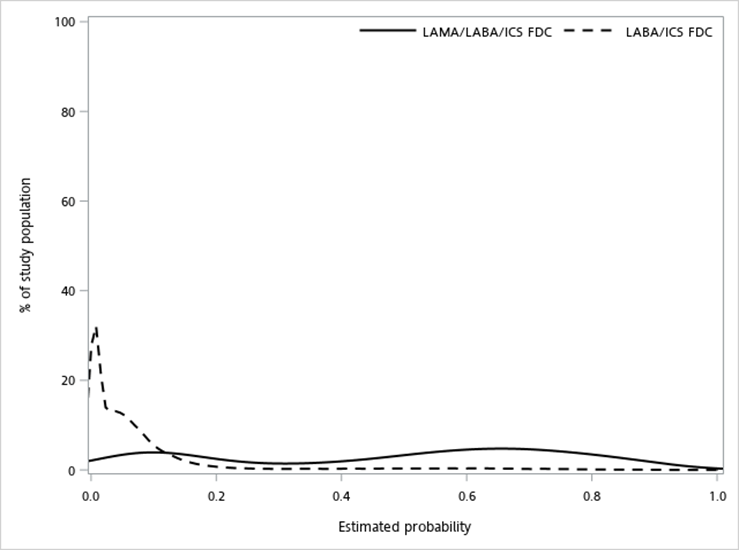
**


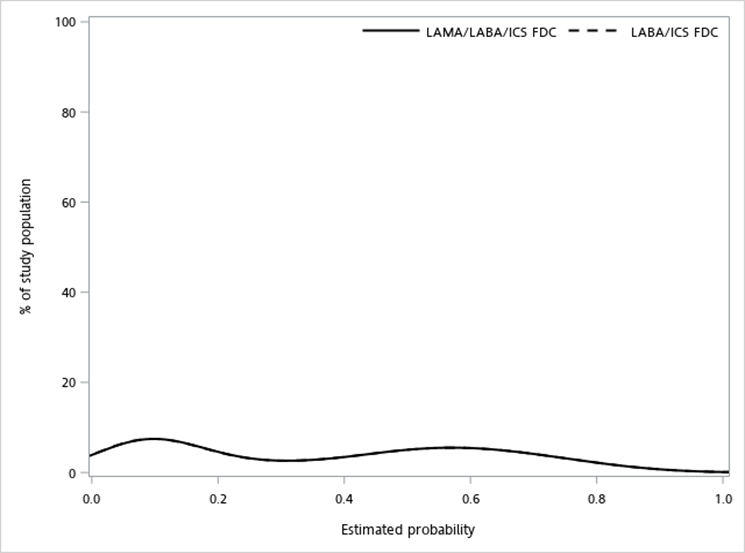


FDC, fixed-dose combination; ICS, inhaled corticosteroids; LABA, long-acting β2 agonists; LAMA, long-acting muscarinic antagonists; PS, propensity score.

aOne LAMA/LABA/ICS FDC initiator versus one randomly sampled LABA/ICS FDC user in each matched subset.

**eFigure 4.** Cumulative incidence plots of composite cardiovascular events for LAMA/LABA/ICS FDC and LABA/ICS FDC. (a) Before PS matching. (b) After 1:10 variable-ratio PS matchinga.

(a)


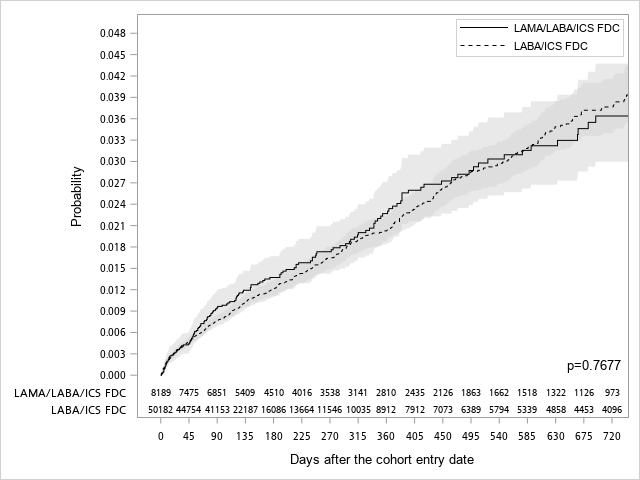


(b)


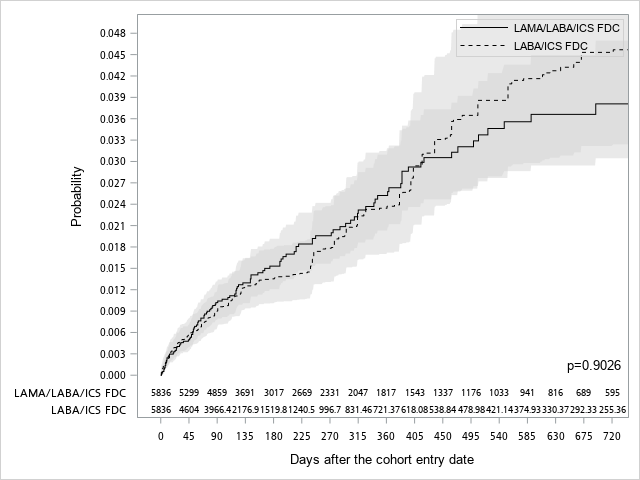


FDC, fixed-dose combination; ICS, inhaled corticosteroids; LABA, long-acting β2 agonists; LAMA, long-acting muscarinic antagonists; PS, propensity score.

aData after PS matching were weighted by the inverse of the matching ratio.

**eReferences**

1. Coloma PM, Valkhoff VE, Mazzaglia G, Nielsson MS, Pedersen L, Molokhia M, et al. Identification of acute myocardial infarction from electronic healthcare records using different disease coding systems: a validation study in three European countries. BMJ Open. 2013;3:e002862.
2. Sundbøll J, Adelborg K, Munch T, Frøslev T, Sørensen HT, Bøtker HE, et al. Positive predictive value of cardiovascular diagnoses in the Danish National Patient Registry: a validation study. BMJ Open. 2016;6:e012832.
3. Hsieh MT, Hsieh CY, Tsai TT, Wang YC, Sung SF. Performance of ICD-10-CM diagnosis codes for identifying acute ischemic stroke in a National Health Insurance claims database. Clin Epidemiol. 2020;12:1007-1013.
4. Bosco-Lévy P, Duret S, Picard F, Dos Santos P, Puymirat E, Gilleron V, et al. Diagnostic accuracy of the International Classification of Diseases, Tenth Revision, codes of heart failure in an administrative database. Pharmacoepidemiol Drug Saf. 2019;28:194-200.
5. Hennessy S, Leonard CE, Freeman CP, Deo R, Newcomb C, Kimmel SE, et al. Validation of diagnostic codes for outpatient-originating sudden cardiac death and ventricular arrhythmia in Medicaid and Medicare claims data. Pharmacoepidemiol Drug Saf. 2010;19:555-562.
6. Hennessy S, Leonard CE, Newcomb C, Kimmel SE, Bilker WB. Cisapride and ventricular arrhythmia. Br J Clin Pharmacol. 2008;66:375-385.
7. Lipson DA, Barnhart F, Brealey N, Brooks J, Criner GJ, Day NC, et al. IMPACT Investigators. Once-daily single-inhaler triple versus dual therapy in patients with COPD. N Engl J Med. 2018;378:1671-1680.
8. Rabe KF, Martinez FJ, Ferguson GT, Wang C, Singh D, Wedzicha JA, et al. ETHOS Investigators. Triple Inhaled Therapy at Two Glucocorticoid Doses in Moderate-to-Very-Severe COPD. N Engl J Med. 2020;383:35-48.
9. Singh D, Papi A, Corradi M, Pavlišová I, Montagna I, Francisco C, et al. Single inhaler triple therapy versus inhaled corticosteroid plus long-acting β2-agonist therapy for chronic obstructive pulmonary disease (TRILOGY): a double-blind, parallel group, randomised controlled trial. Lancet. 2016;388:963-973.
